# Supplementary material for: Association Between Chemotherapy and Survival in T1 Colon Cancer With Lymph Node Metastasis: A Propensity-Score Matched Analysis
Source: Frontiers journal article supplement (doi:10.3389/fonc.2021.699400), 2021-07-30

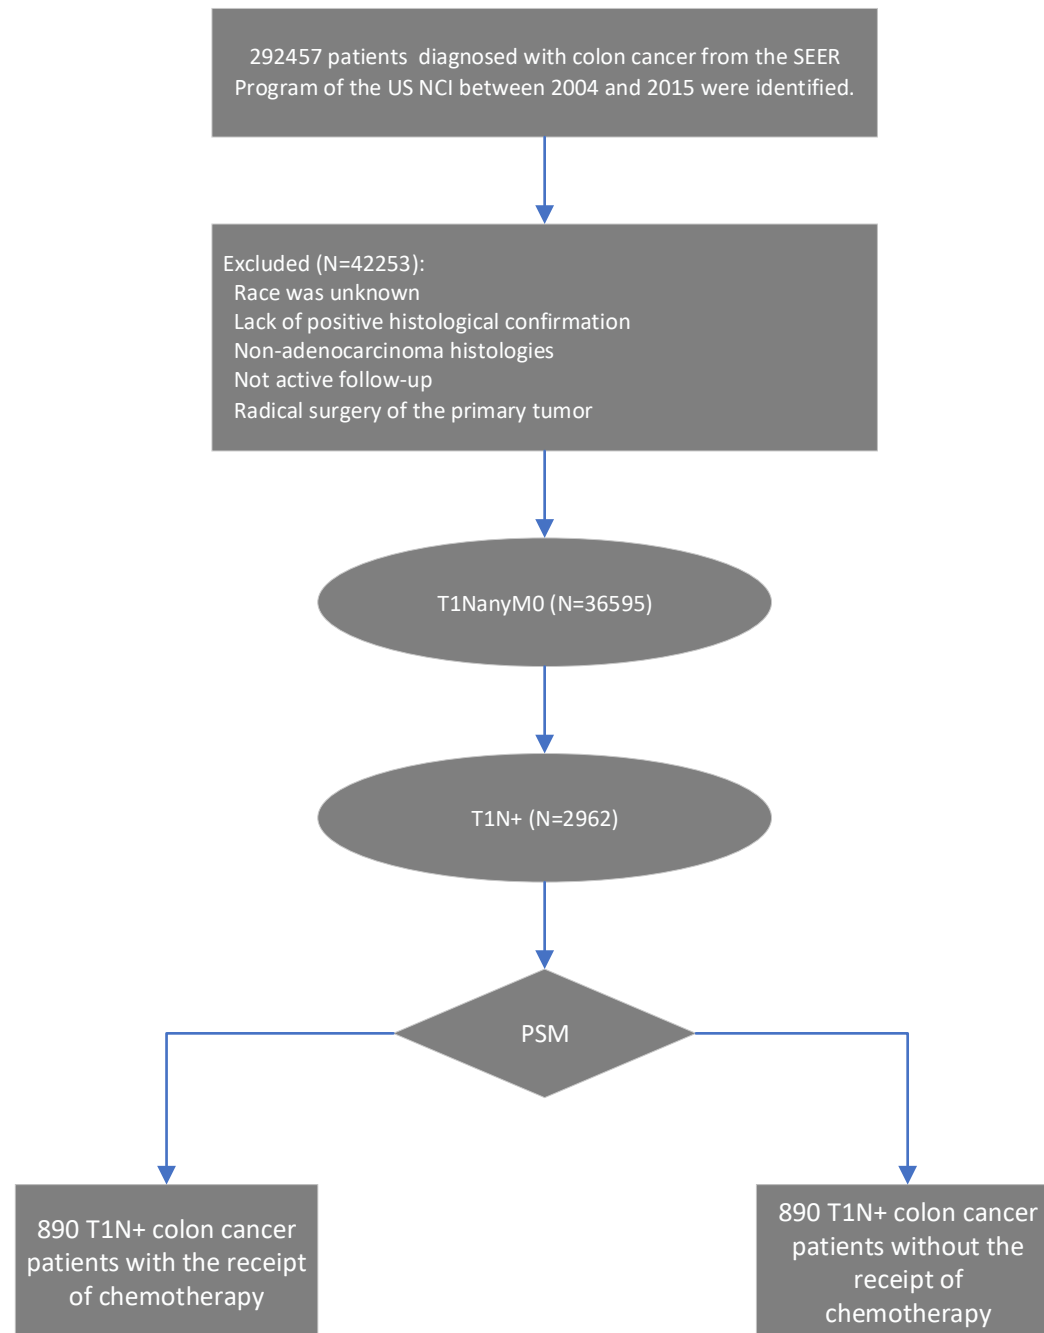

Supplement: Data_Sheet_1.PDF [file Data_Sheet_1.PDF]
